# Supplementary material for: CD146+ Endometrial-Derived Mesenchymal Stem/Stromal Cell Subpopulation Possesses Exosomal Secretomes with Strong Immunomodulatory miRNA Attributes
Source: MDPI journal article supplement (doi:10.3390/cells11244002), 2022-12-10
Supplement: s1 [file s1]

# Supplementary Material

**A**

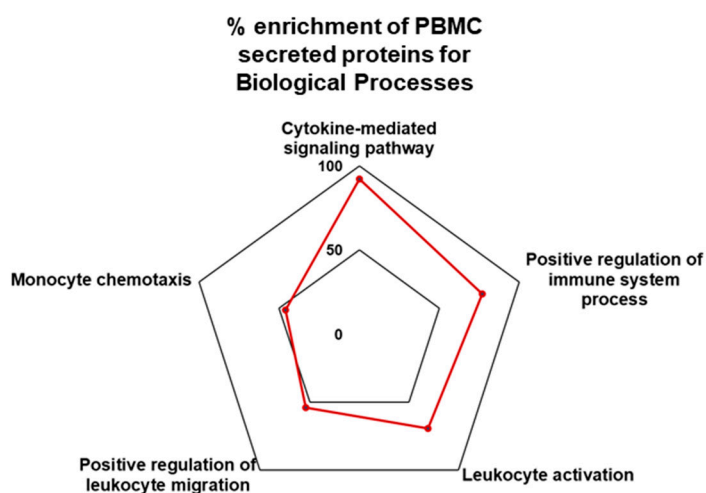

**B**

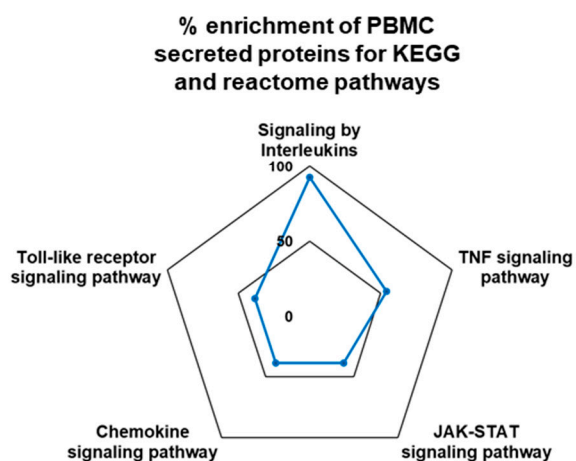

**Supplementary Figure S1.** Percentage (%) enrichment of PBMC secreted proteins for biological processes (A), KEGG, and reactome pathways (B).
